# Supplementary material for: Photoreactions of bicyclic aziridines with alkenes and alkynes: a novel synthetic methodology for 8-azabicyclo[3.2.1]octane derivatives
Source: Royal Society of Chemistry journal article supplement (doi:10.1039/b805801f), 2008-01-01

Electronic supplementary information

**Photoreactions of bicyclic aziridines with alkenes and alkynes: The novel synthetic methodology of 8-azabicyclo[3.2.1]octane derivatives**

Keitaro Ishii,\* Motohiro Kido, Masahiro Noji and Shigeo Sugiyama

Phase-sensitive NOESY of Compounds

**(E)-15a, (Z)-15a, (E)-15b, (Z)-17a, (Z)-18a, (Z)-18b and c, (Z)-23 and 25a**

Important cross peaks show two-headed arrows in the figures. (R=CO<sub>2</sub>Et, R'=CO<sub>2</sub>Me)

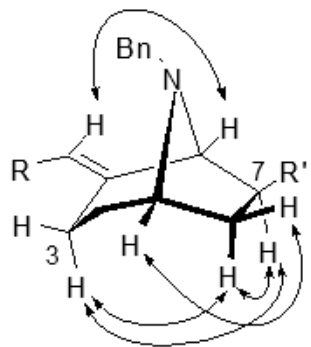

(E)-15a  
in CDCl<sub>3</sub>

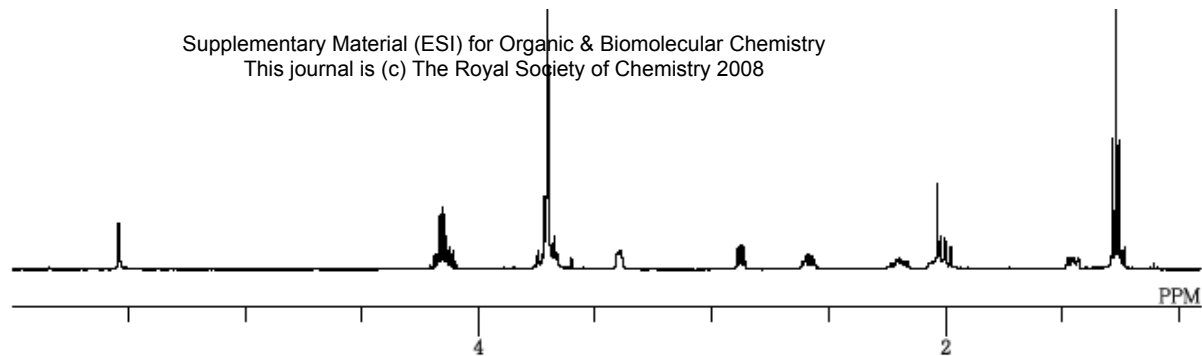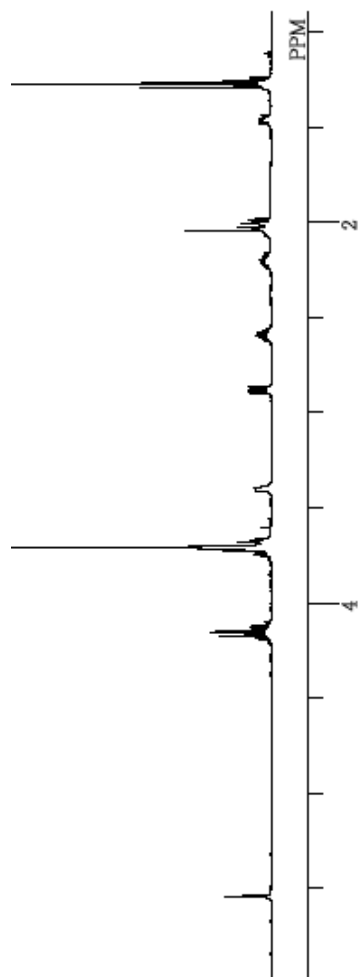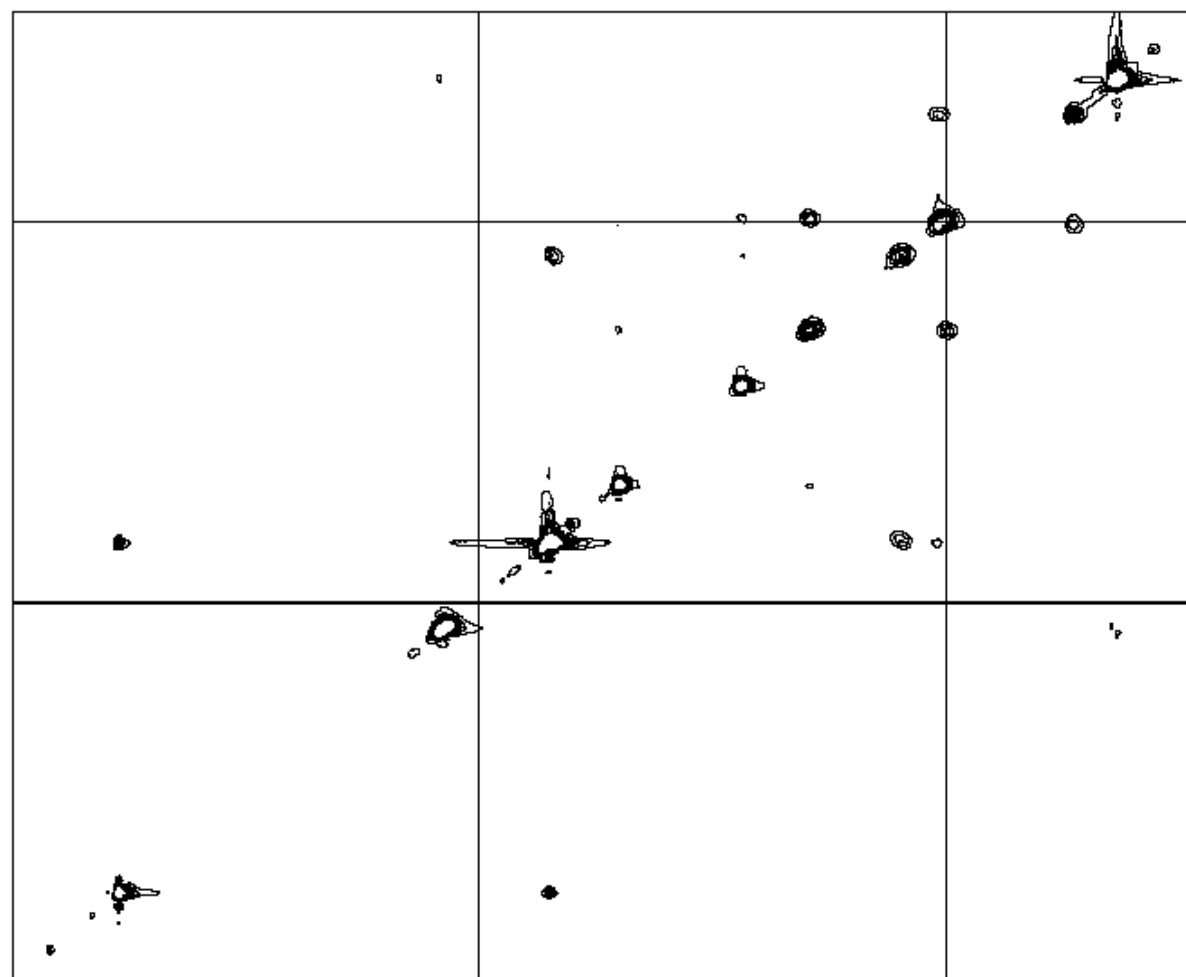

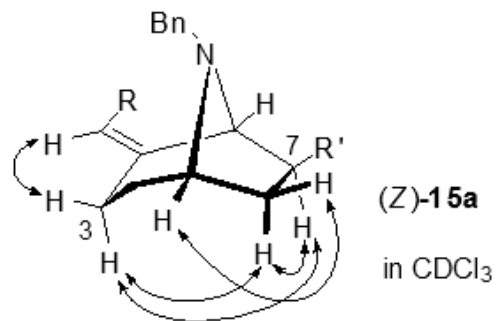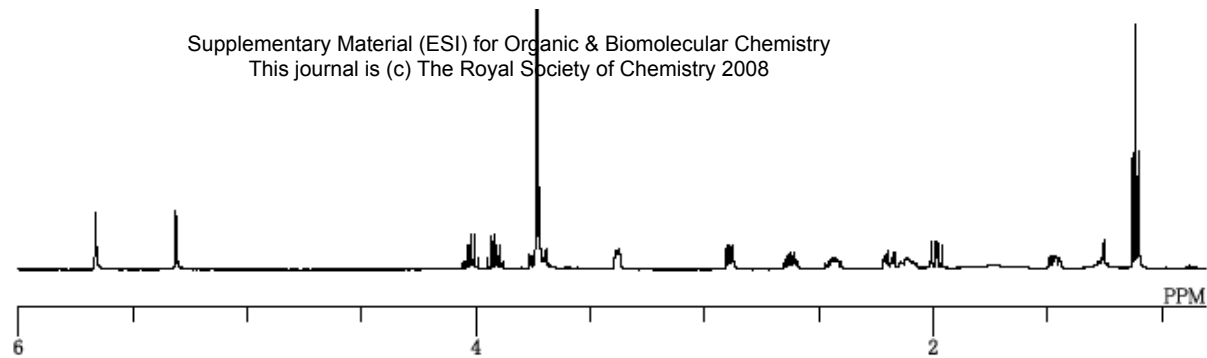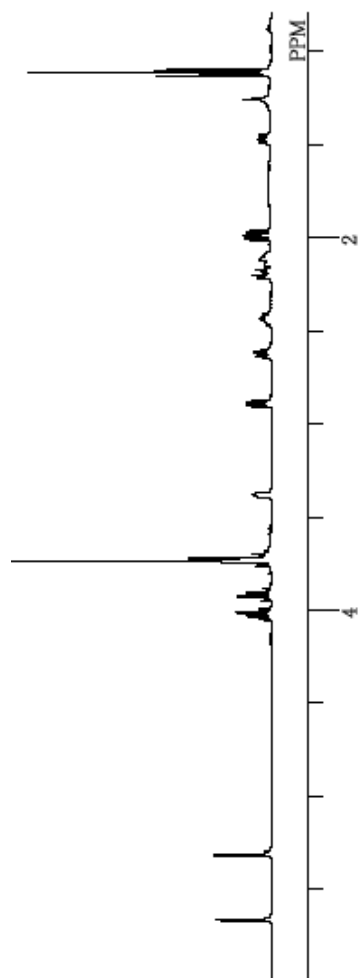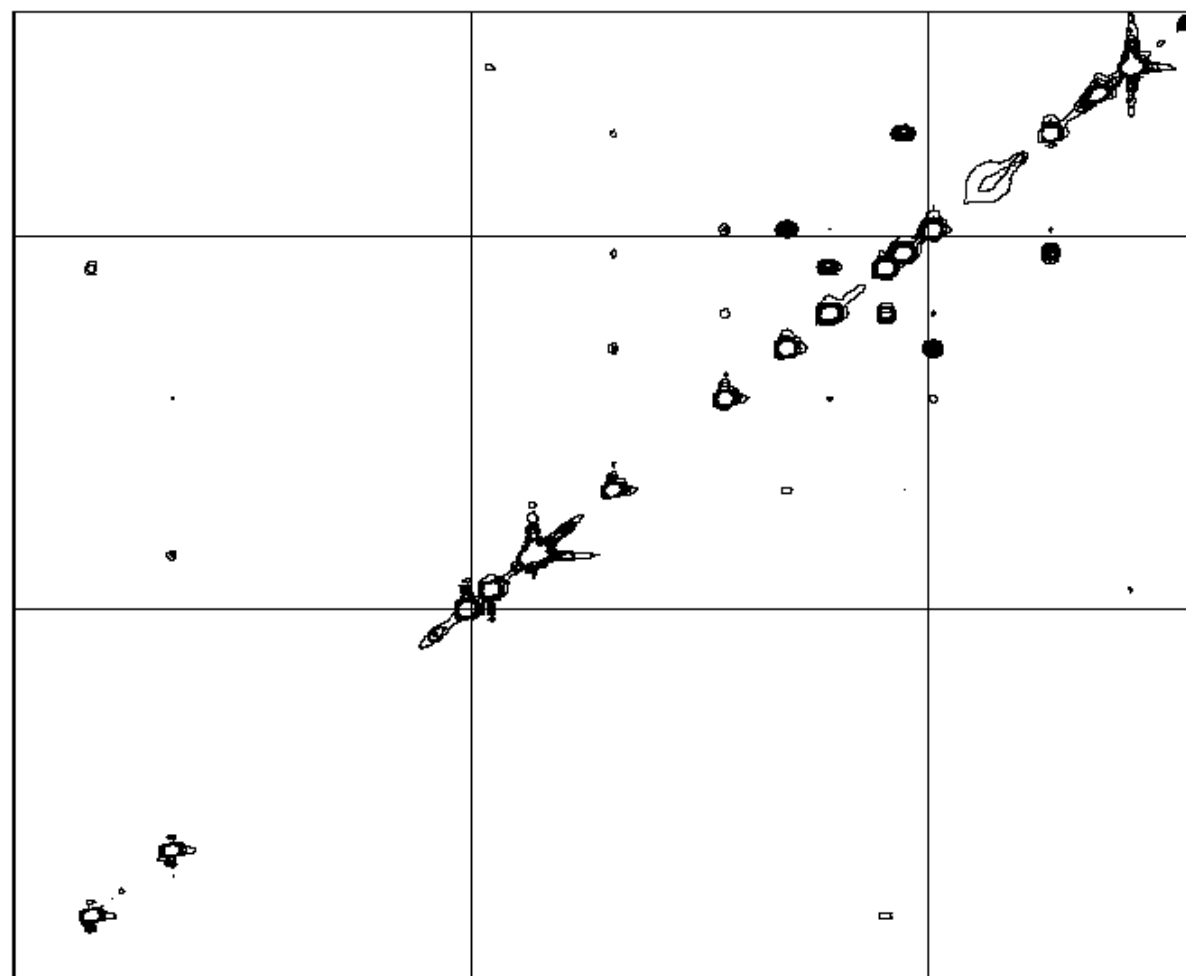

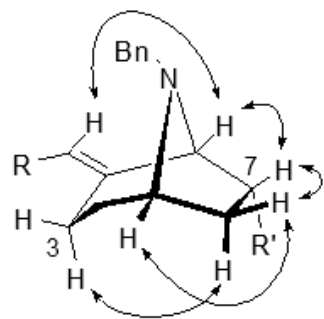

**(E)-15b**  
in CDCl<sub>3</sub>

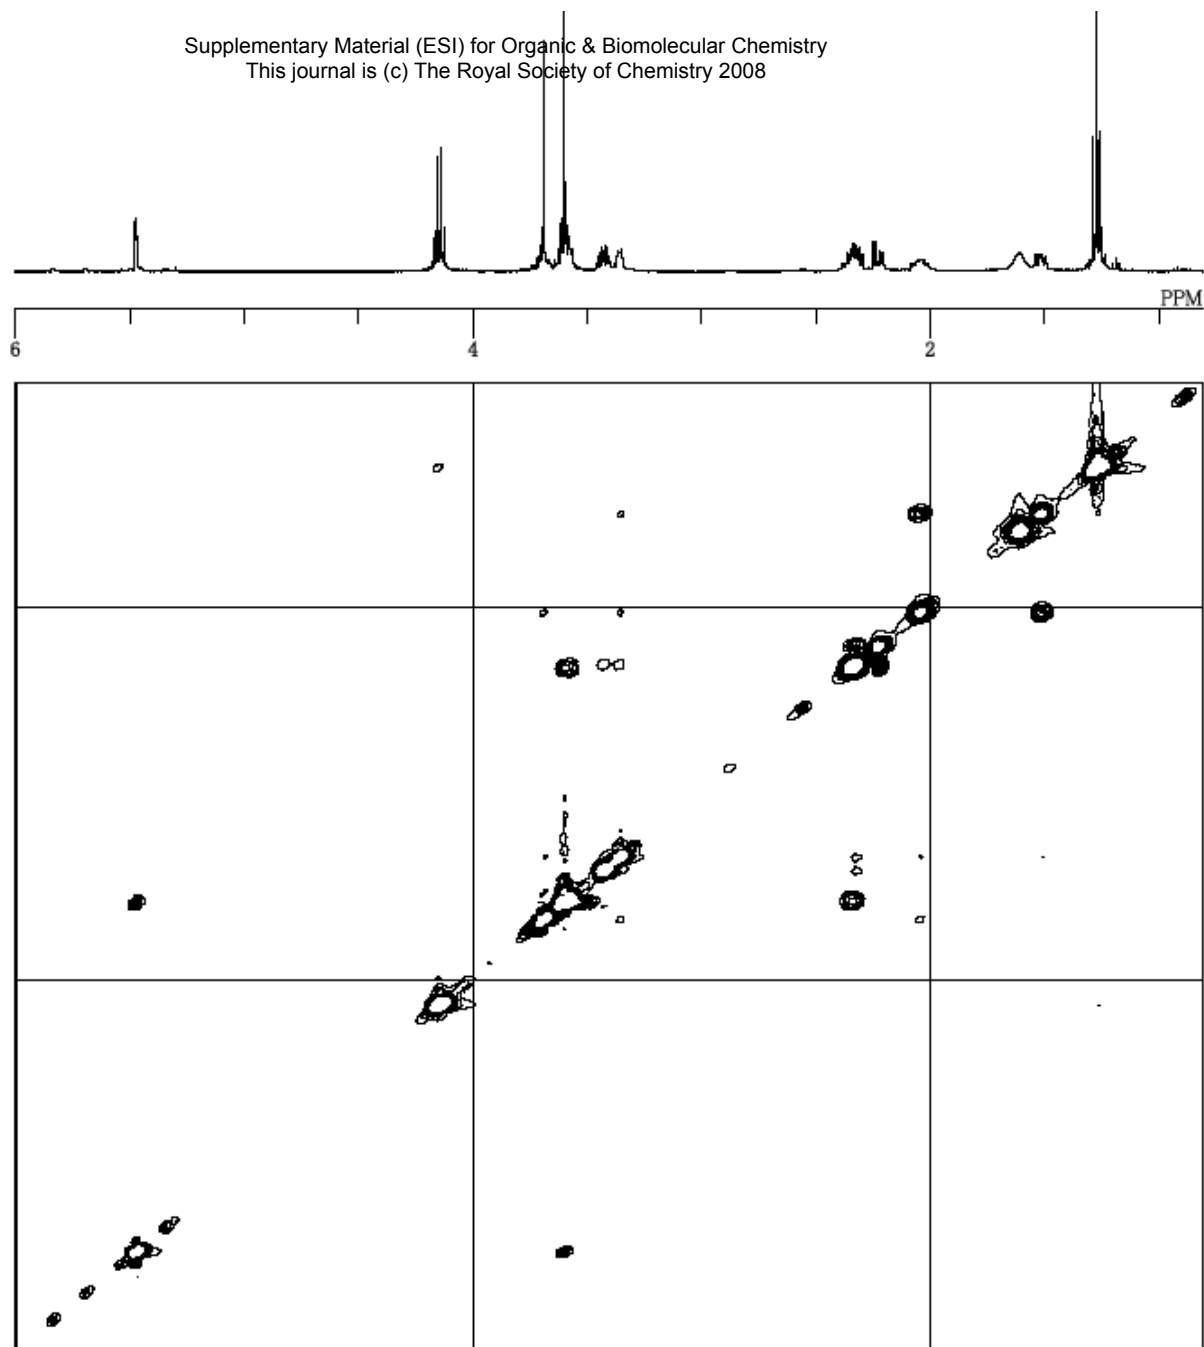

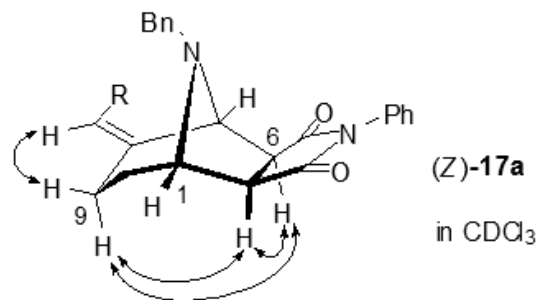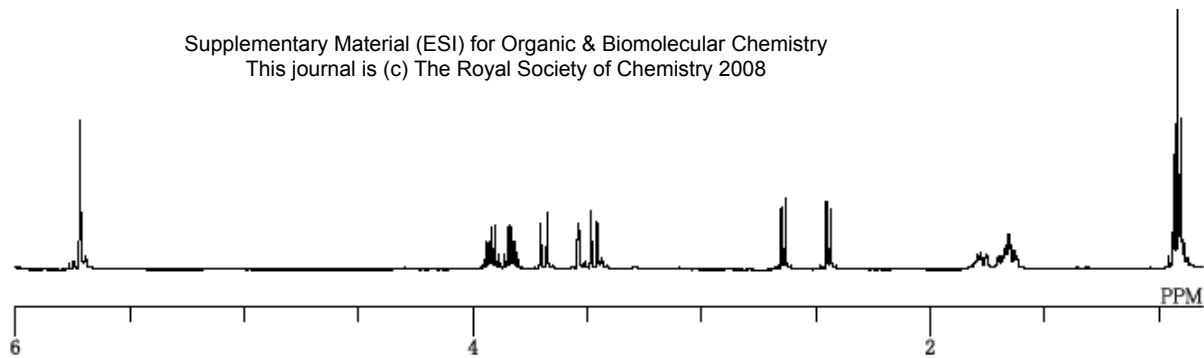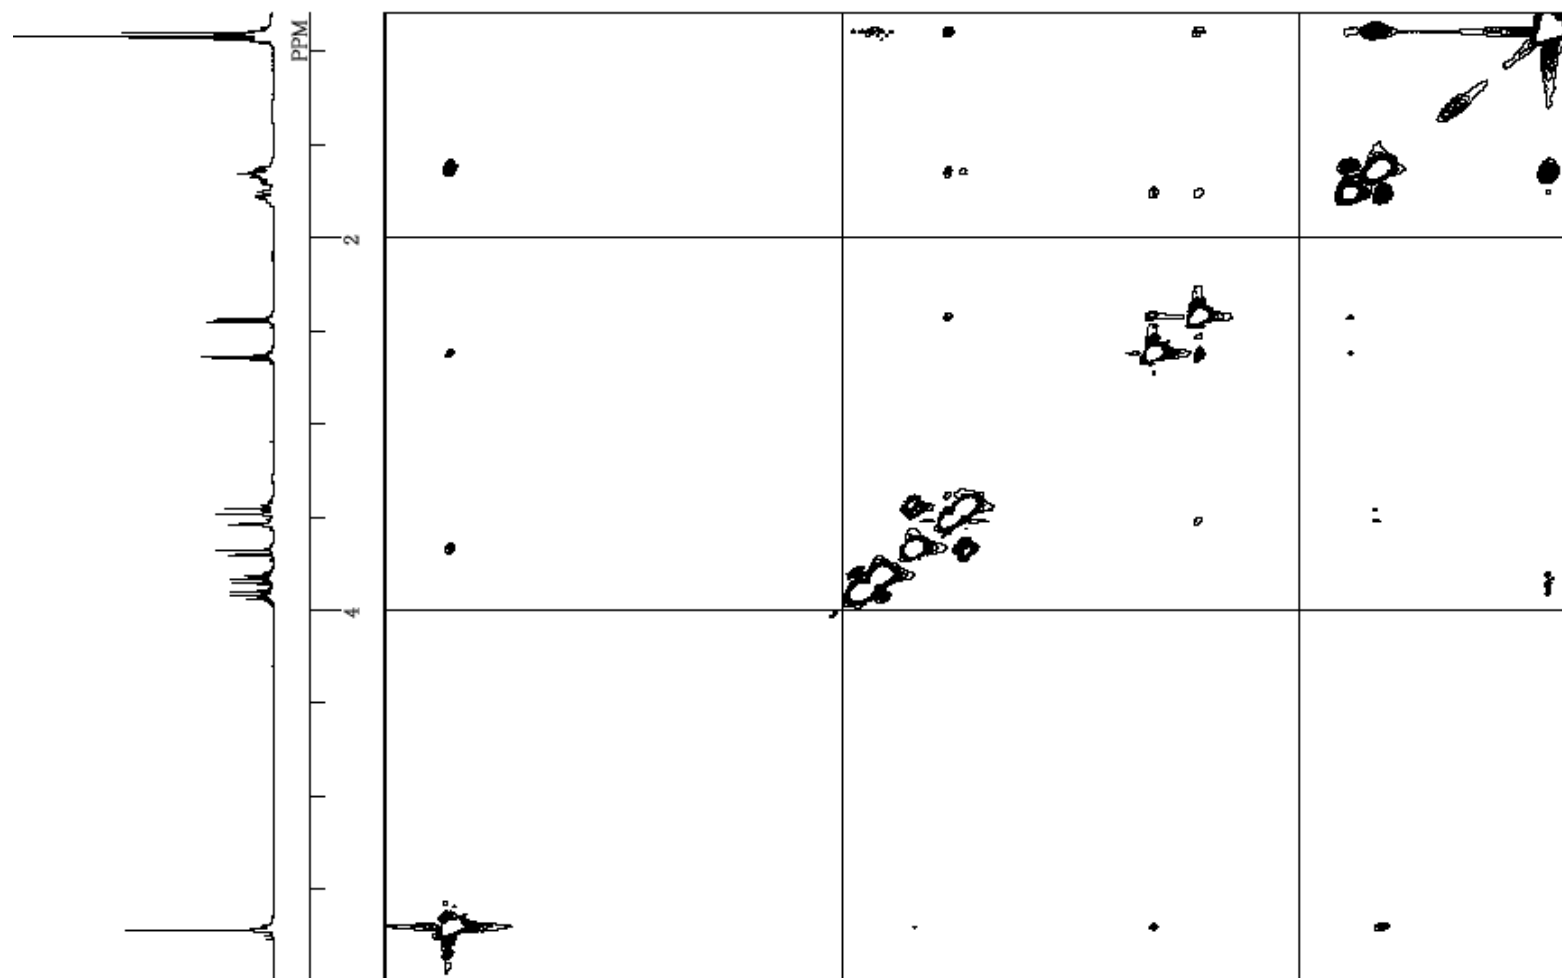

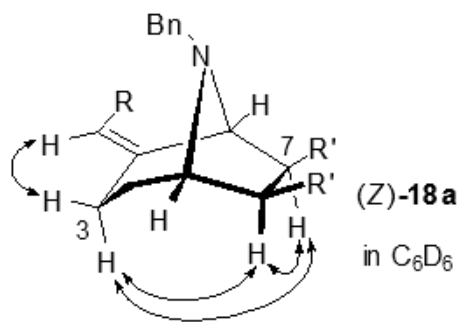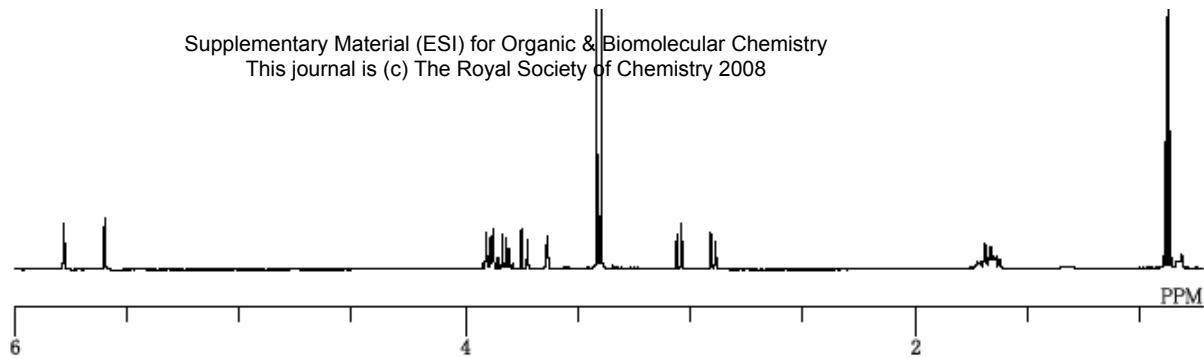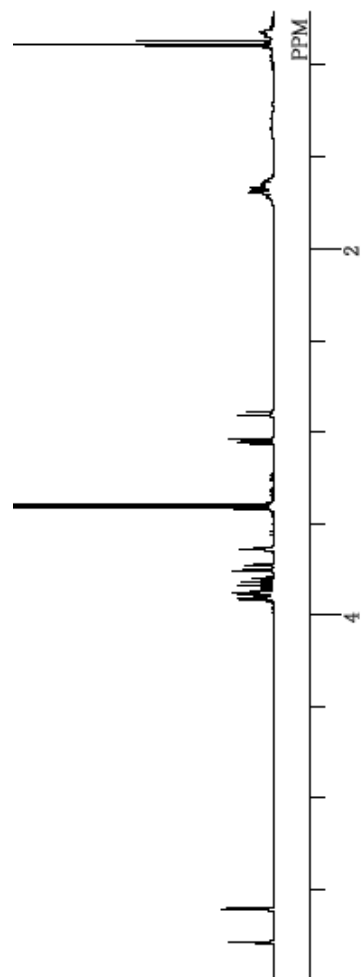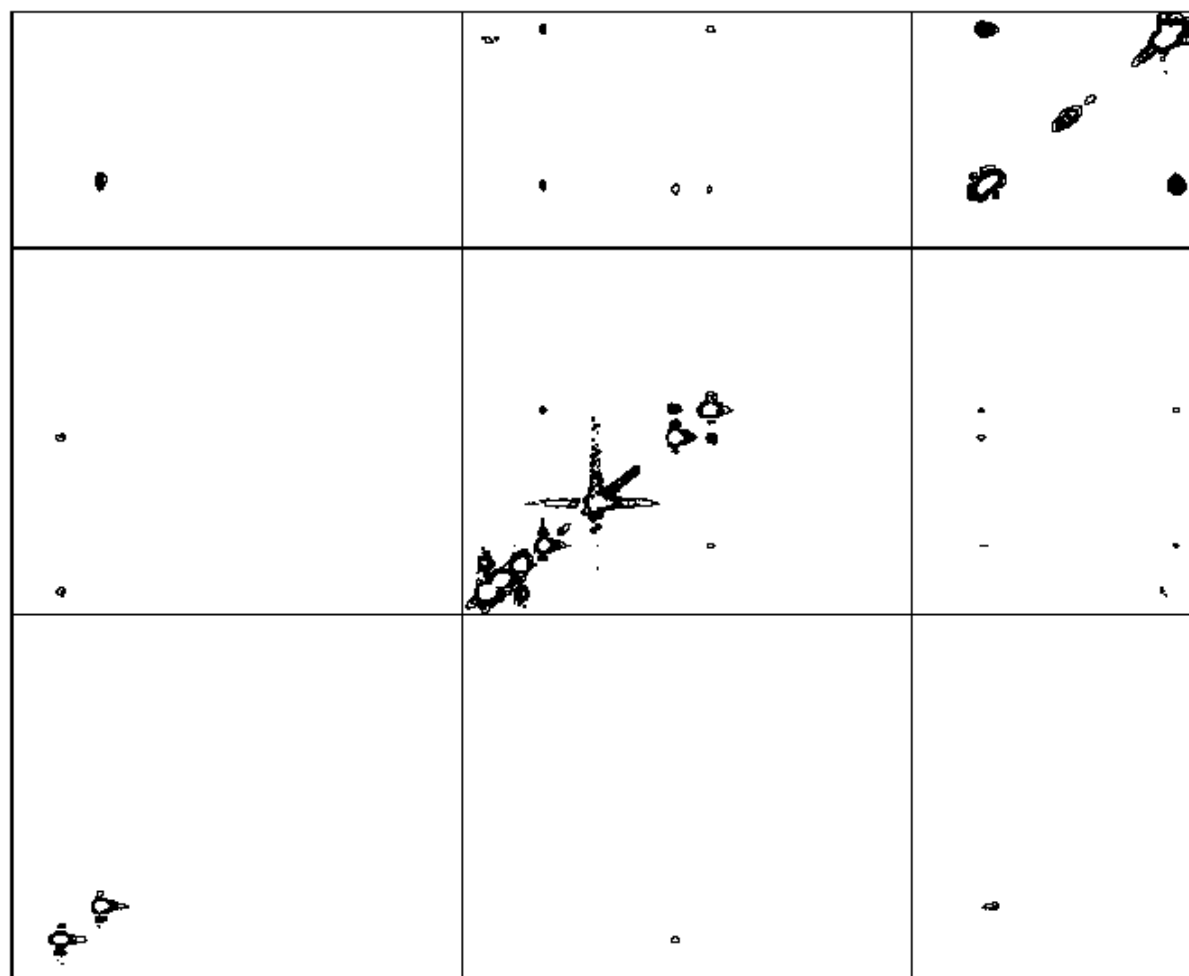

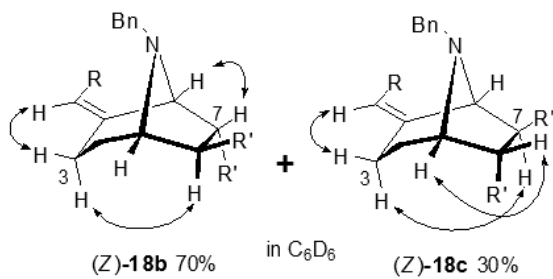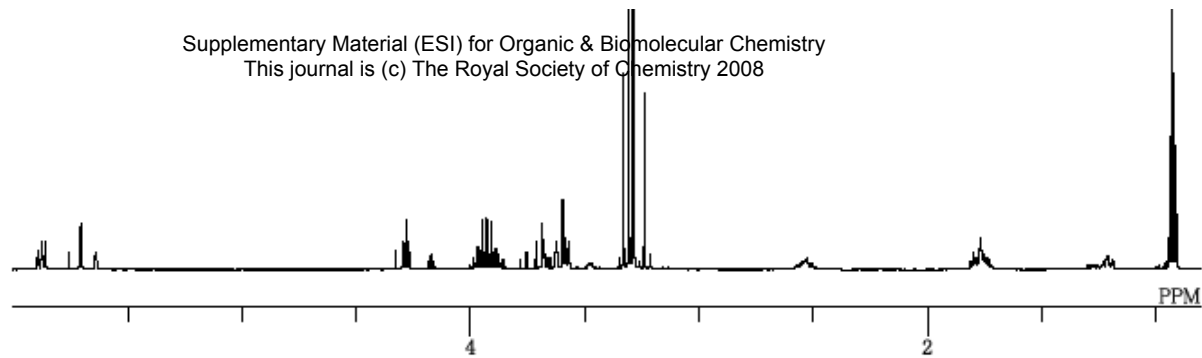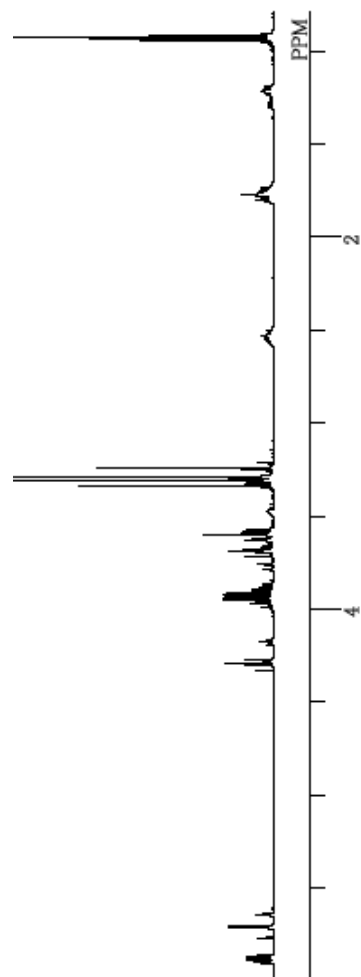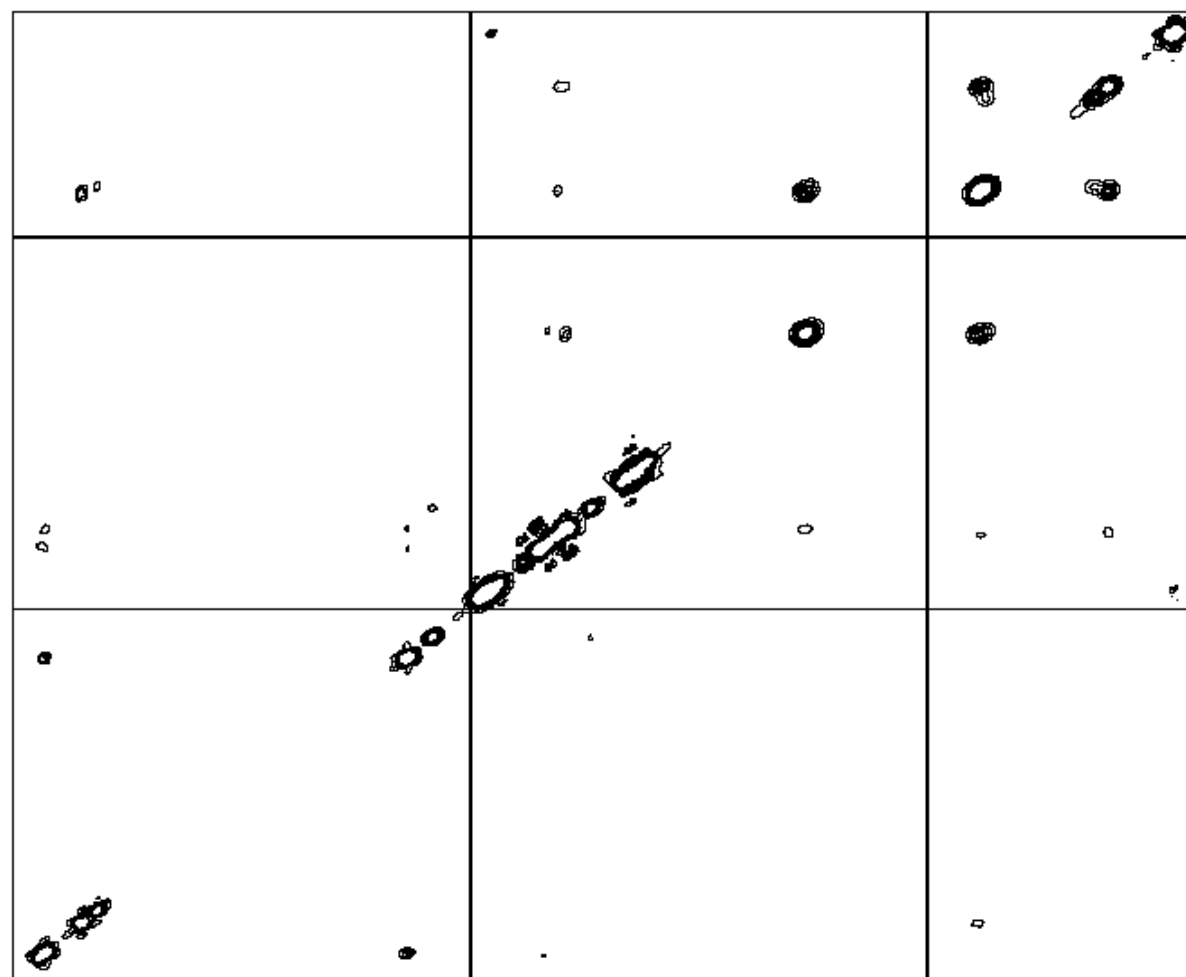

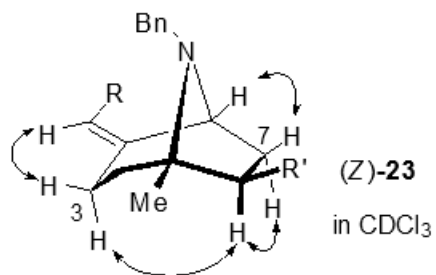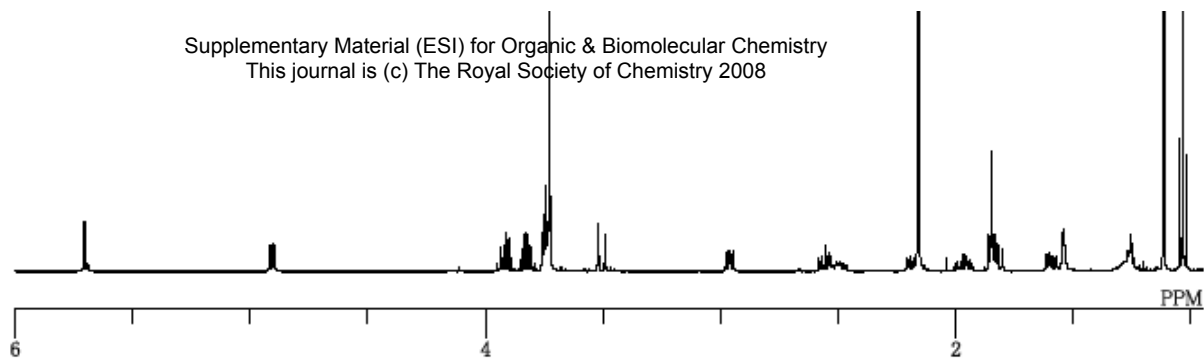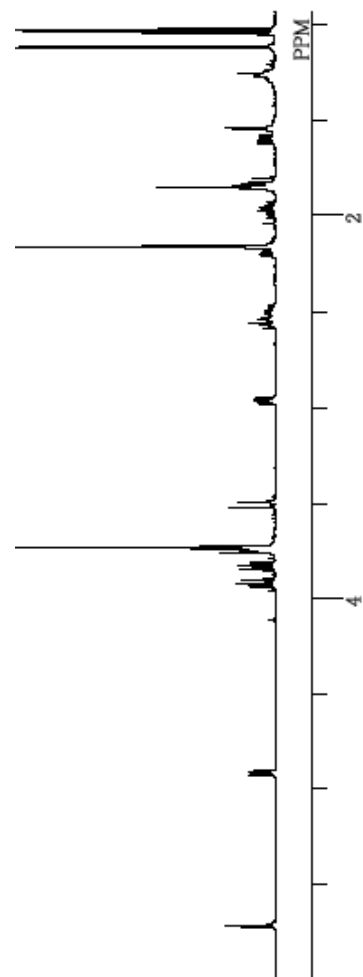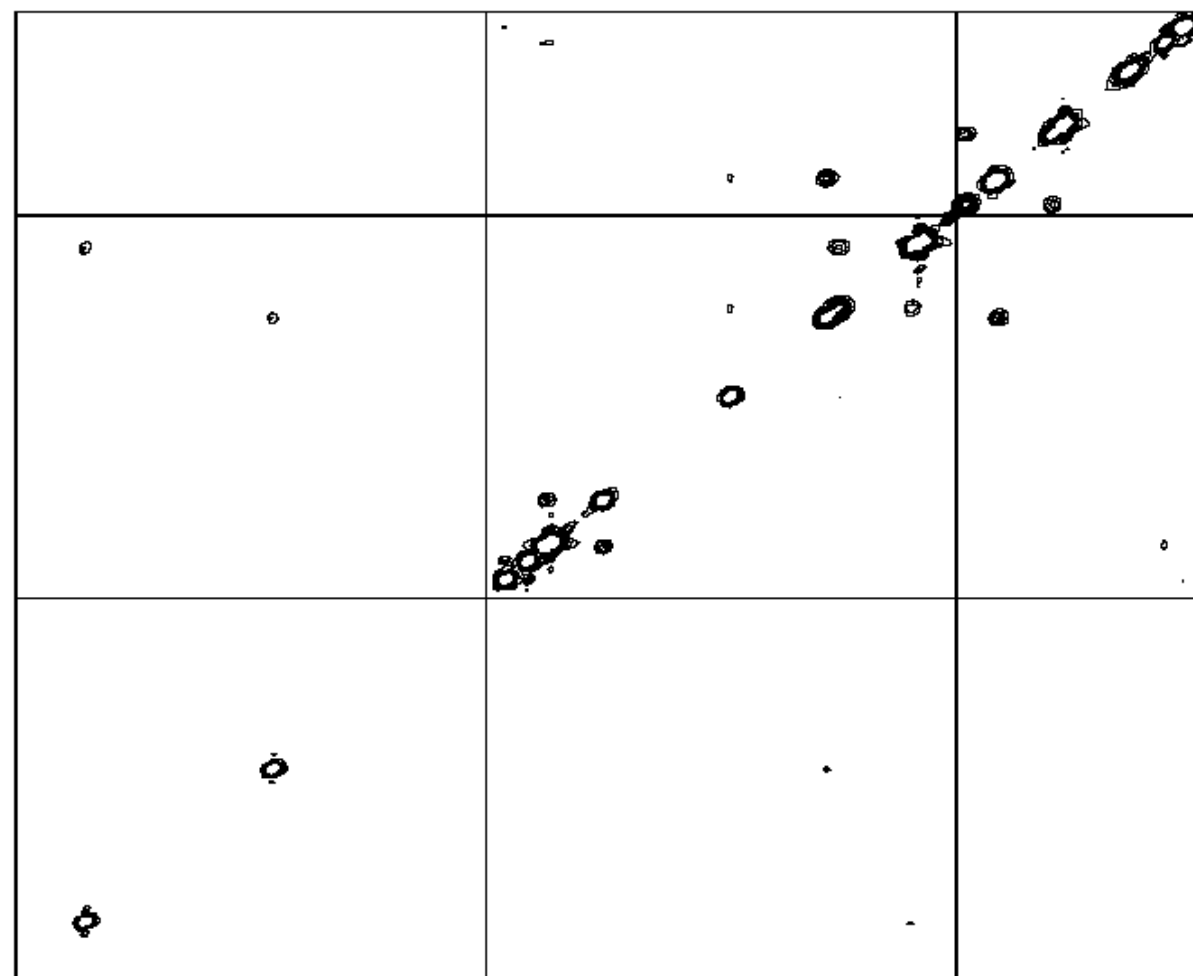



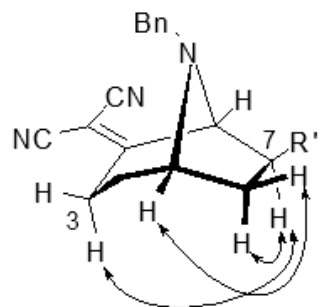

**25a**  
in CDCl<sub>3</sub>

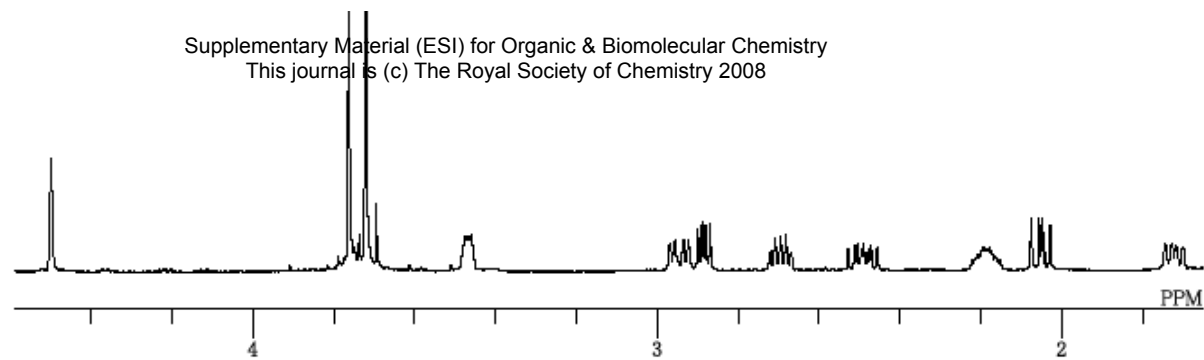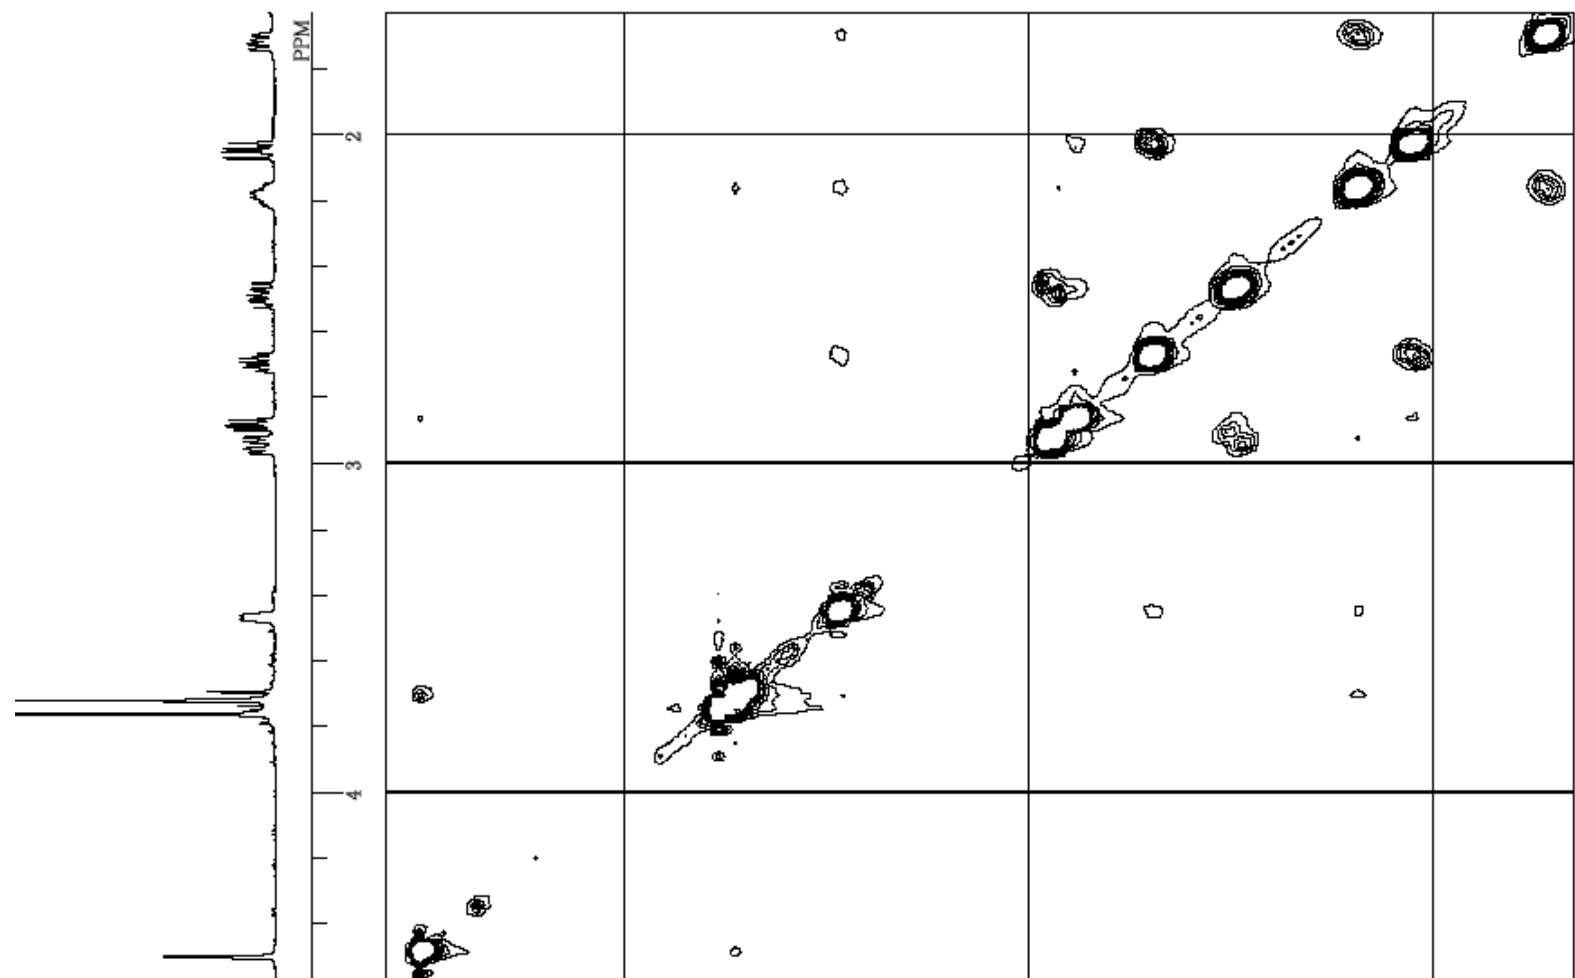

Supplement: b805801f.pdf [file b805801f.pdf]
